# Supplementary material for: Polyvinylpyrrolidone/cellulose acetate electrospun composite nanofibres loaded by glycerine and garlic extract within vitroantibacterial activity and release behaviour test
Source: Royal Society of Chemistry journal article supplement (doi:10.1039/c9ra04072b), 2019-01-01

## Electronic Supplementary Information

### **Polyvinylpyrrolidone/Cellulose Acetate (PVP/CA) Electrospun Composite Nanofibers Loaded by Glycerine and Garlic Extract with In-Vitro Antibacterial Activity and Release Behavior Test**

Dhewa Edikresnha<sup>a,b</sup>, Tri Suciati<sup>c</sup>, Muhammad Miftahul Munir<sup>a,b,\*</sup> and Khairurrijal  
Khairurrijal<sup>a,b,\*\*</sup>

<sup>a</sup>*Department of Physics, Faculty of Mathematics and Natural Sciences,*

<sup>b</sup>*Research Center for Biosciences and Biotechnology, Institute for Research and  
Community Services,*

<sup>c</sup>*Department of Pharmaceutics, School of Pharmacy,*

*Institut Teknologi Bandung, Jalan Ganesa 10, Bandung 40132, Indonesia*

---

Tel. or fax: +6222 86010050 (tel)/+6222 86010051 (fax).

E-mail address: [krijal@fi.itb.ac.id](mailto:krijal@fi.itb.ac.id) (Khairurrijal)

**Fig. S1** FTIR spectra of PVP powder, CA powder, Glycerin, and Garlic Extract.

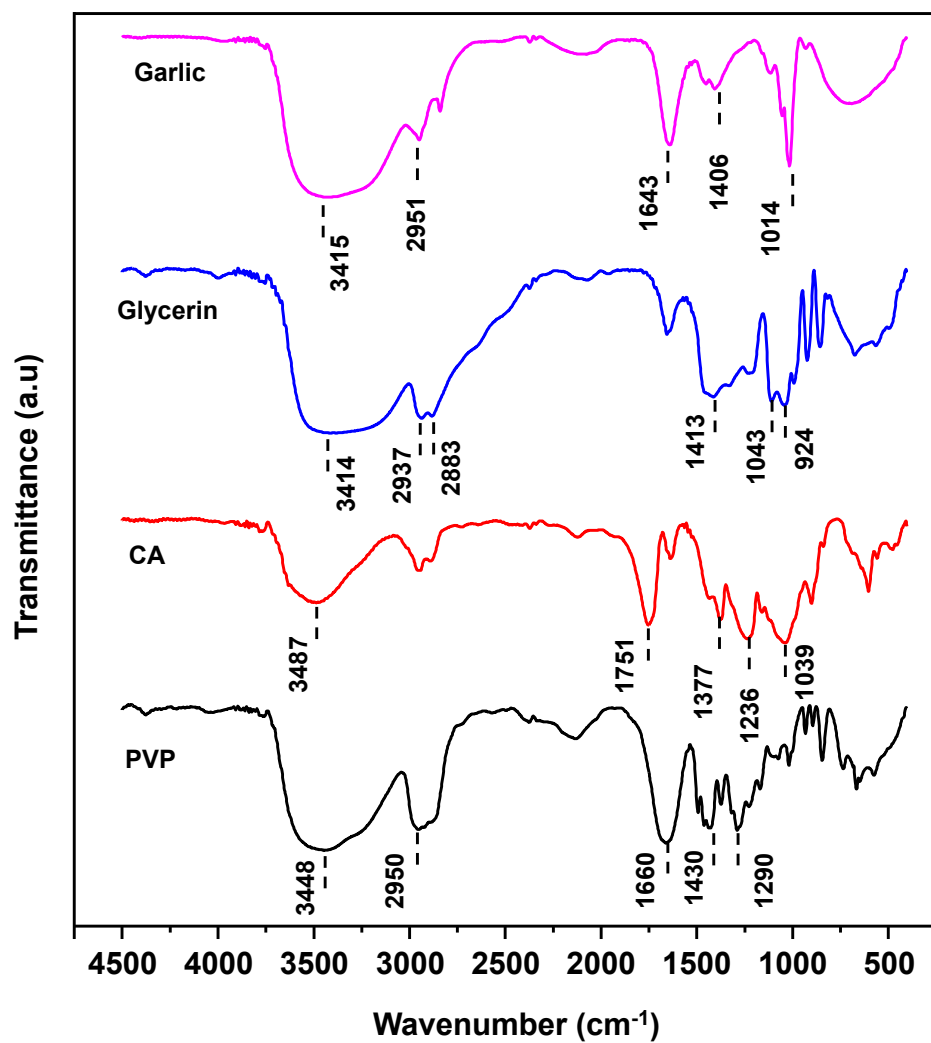

**Fig. S2** The appearance of the wells after 24 hours incubation. The words “pa” stands for *Pseudomonas Aeruginosa* while the words “Sa” refers to *Staphylococcus aureus*.

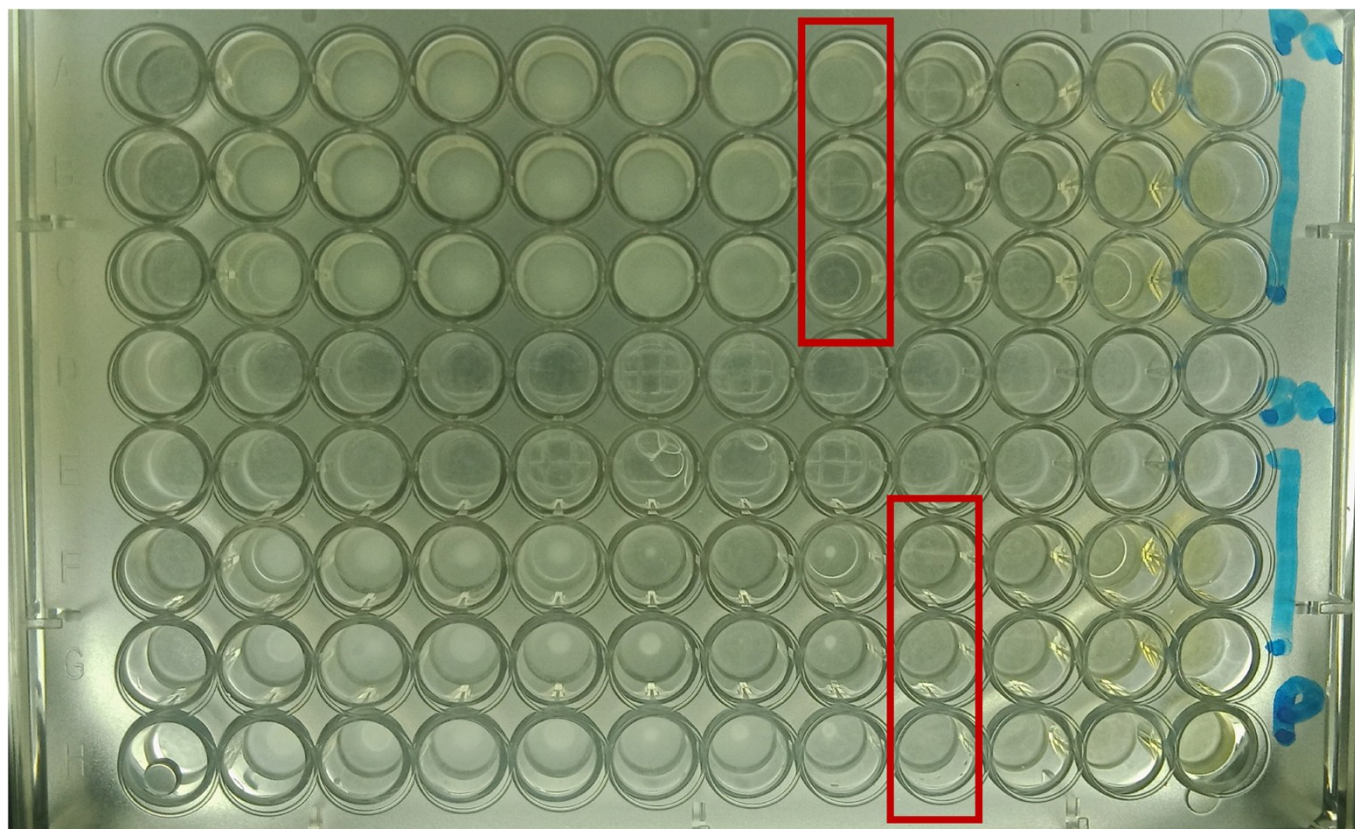

**Fig. S3** The results of scratching one use of MHB solution on the microplate onto MHA media after incubation for 24 hours. The words “pa” stands for *Pseudomonas Aeruginosa* while the words “Sa” refers to *Staphylococcus aureus*.

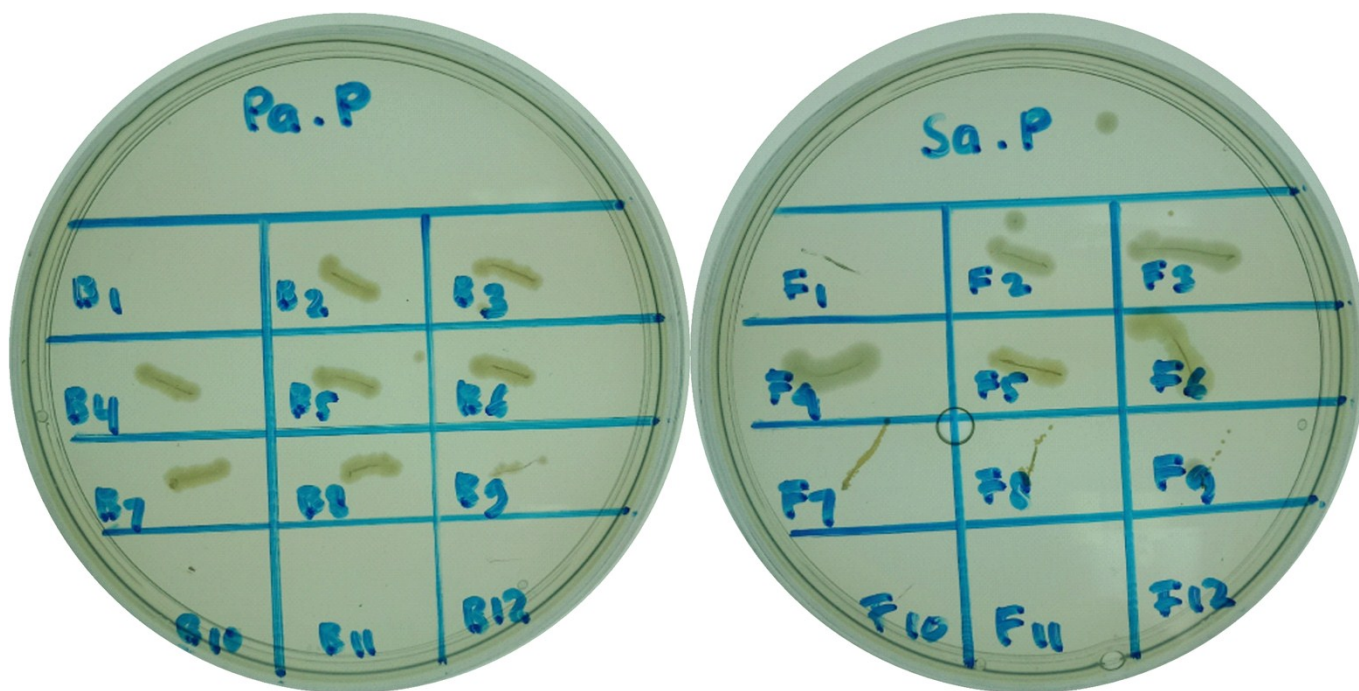

**Fig. S4** *S. aureus* bacterial colonies that grow after contact with the membrane for 24 hours. (a) *S. aureus* control, (b) PVP/CA, (c) PVP/CA/Glycerin; (d) PVP/CA/Garlic; (e) PVP/CA/Glycerin/Garlic.

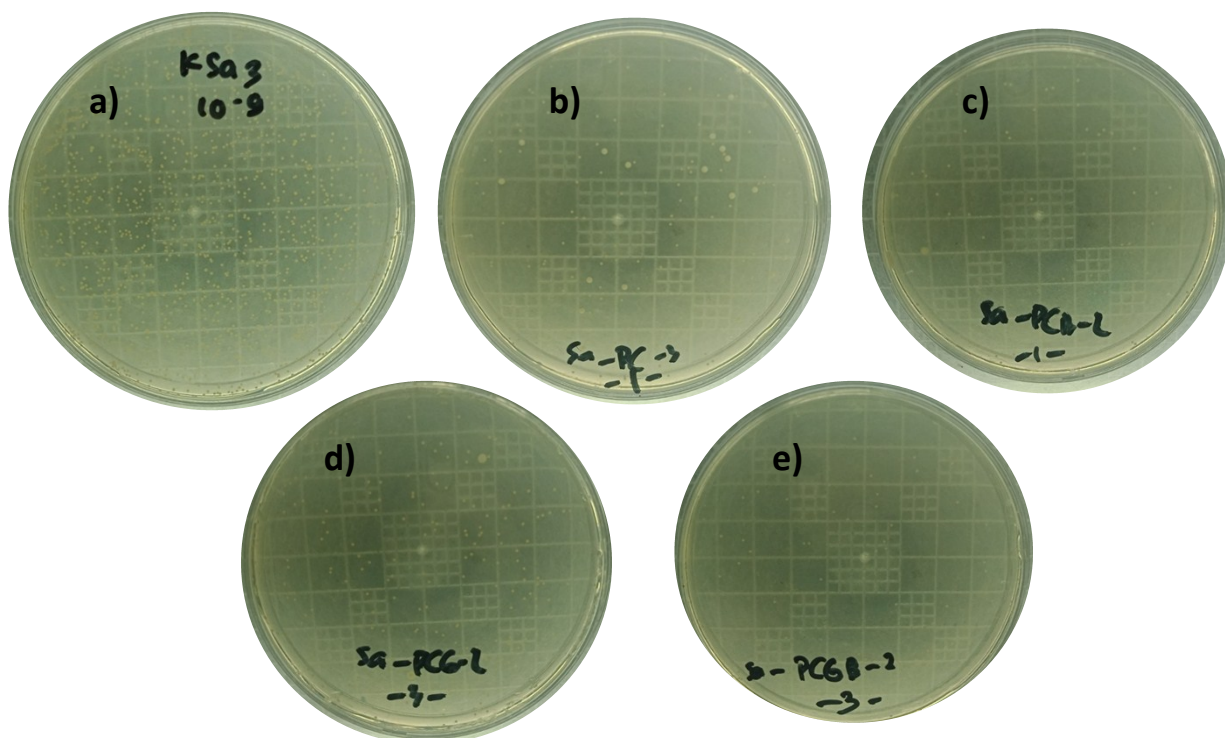



**Fig. S5** Colonies of *P. aeruginosa* bacteria that grow after contact with membrane for 24 hours. (a) *P. aeruginosa* control, (b) PVP/CA, (c) PVP/CA/Glycerin; (d) PVP/CA/Garlic; (e) PVP/CA/Glycerin/Garlic.

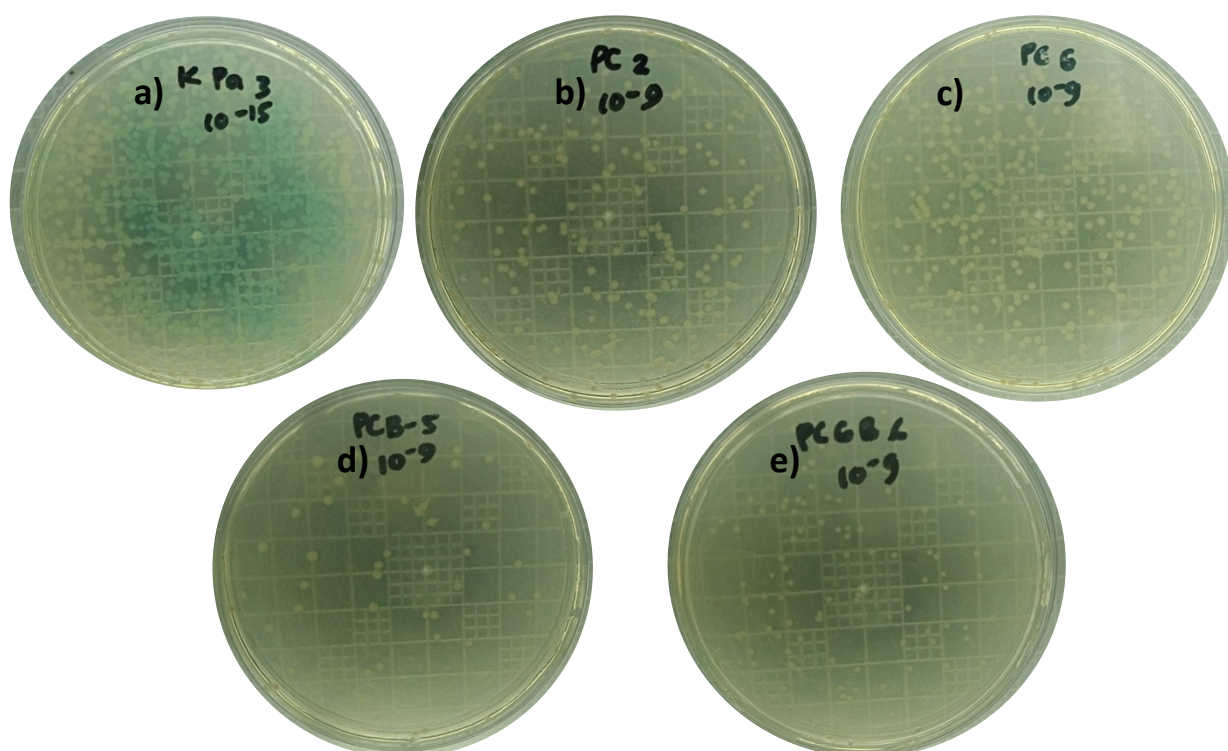

Supplement: c9ra04072b1.pdf [file c9ra04072b1.pdf]
